# Supplementary material for: Biodiversity Can Help Prevent Malaria Outbreaks in Tropical Forests
Source: PLoS Negl Trop Dis. 2013 Mar 21;7(3):e2139. doi: 10.1371/journal.pntd.0002139 (PMC3605282; doi:10.1371/journal.pntd.0002139)
Supplement: Figure S8 — Sensitivity analysis: if then . A, B: Decrease in abundance of non-vector mosquito species can increase risk of malaria transmission () in The Guarani Mbya village and Marujá, respectively; C, D: Decrease in abundance of non-host vertebrate species does not increase risk of malaria transmission () in The Guarani Mbya village and Marujá, respectively. The parameter is 5.3 in The Guarani Mbya village and 3 in Marujá. (PDF) [file pntd.0002139.s011.pdf]

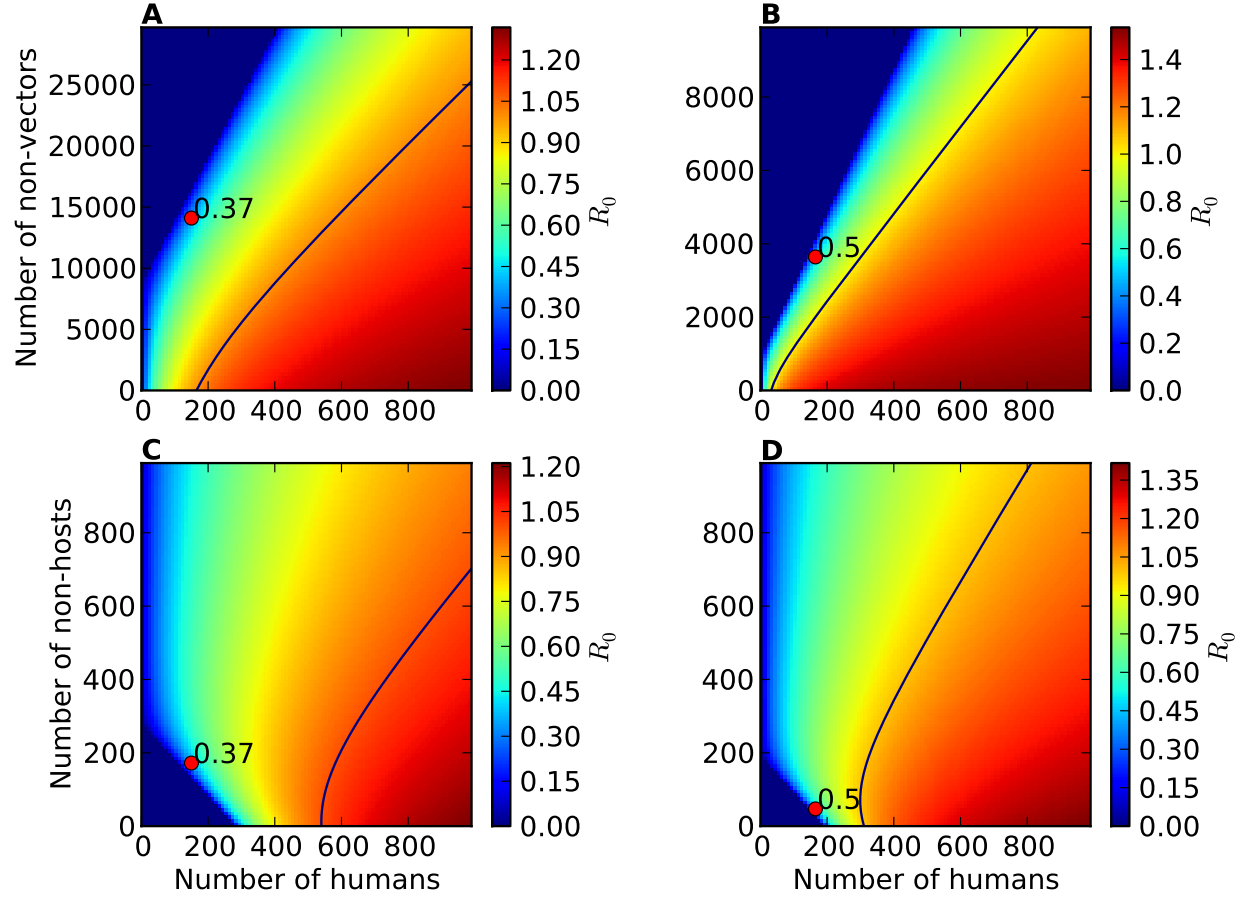

**Figure S8. Sensitivity analysis: if  $h = 21$  then  $R_0 < 1$ .** A, B: Decrease in abundance of non-vector mosquito species can increase risk of malaria transmission ( $R_0 > 1$ ) in The Guarani Mbya village and Marujá, respectively; C, D: Decrease in abundance of non-host vertebrate species does not increase risk of malaria transmission ( $R_0 < 1$ ) in The Guarani Mbya village and Marujá, respectively. The parameter  $\alpha$  is 5.3 in The Guarani Mbya village and 3 in Marujá.
