# Supplementary material for: Biodiversity Can Help Prevent Malaria Outbreaks in Tropical Forests
Source: PubMed Central journal article supplement (PMC3605282; doi:10.1371/journal.pntd.0002139), 2013-03-21
Supplement: pntd.0002139.s002.pdf [file pntd.0002139.s002.pdf]

## 1 $R_0$ calculation

Below, we present a derivation of the expression for  $R_0$  of the main model, following the method presented in [1]. The procedure for the Ross–MacDonald model is completely analogous.

We denote by  $X_m^*$  the population of vector mosquitoes in the absence of infection, as in the main text, and write down the matrices  $F$  and  $V$ , used to build the *next generation matrix*  $K$ :

$$F = \begin{pmatrix} 0 & \frac{bT_{hM}N}{(B+N)\left(1+\frac{1}{h}\frac{C+X_m^*}{B+N}\right)} \\ \frac{bT_{Mh}X_m^*}{(B+N)\left(1+\frac{1}{h}\frac{C+X_m^*}{B+N}\right)} & 0 \end{pmatrix}$$

$$V = \begin{pmatrix} \gamma & 0 \\ 0 & \mu \end{pmatrix}$$

$$K = FV^{-1} = \begin{pmatrix} 0 & \frac{1}{\mu} \frac{bT_{hM}N}{(B+N)\left(1+\frac{1}{h}\frac{C+X_m^*}{B+N}\right)} \\ \frac{1}{\gamma} \frac{bT_{Mh}X_m^*}{(B+N)\left(1+\frac{1}{h}\frac{C+X_m^*}{B+N}\right)} & 0 \end{pmatrix}$$

The value of  $R_0$  will be given by the largest non-negative eigenvalue of the next generation matrix, which in this case is the same as the *spectral radius*  $\rho$  of the matrix  $K$ , as follow:

$$\begin{aligned} R_0 = \rho(K) &= \frac{b}{(B+N)\left(1+\frac{1}{h}\frac{C+X_m^*}{B+N}\right)} \sqrt{\frac{T_{hM}T_{Mh}NX_m^*}{\gamma\mu}} \\ &= \frac{\mu}{\alpha(B+N)} \sqrt{\frac{T_{hM}T_{Mh}NX_m^*}{\gamma\mu}} \\ &= \frac{\mu}{\alpha(B+N)} \sqrt{\frac{T_{hM}T_{Mh}N \left[ \left( \frac{\alpha b}{\mu} - 1 \right) h(B+N) - C \right]}{\gamma\mu}} \end{aligned}$$

## References

1. van den Driessche P, Watmough J (2008) Further Notes on the Basic Reproduction Number. In: Brauer F, van den Driessche P, Wu J, Allen LJS, editors. *Mathematical epidemiology*. Heidelberg: Springer-Verlag. pp. 159–178.
