# Supplementary material for: Biodiversity Can Help Prevent Malaria Outbreaks in Tropical Forests
Source: PubMed Central journal article supplement (PMC3605282; doi:10.1371/journal.pntd.0002139), 2013-03-21
Supplement: pntd.0002139.s009.pdf [file pntd.0002139.s009.pdf]

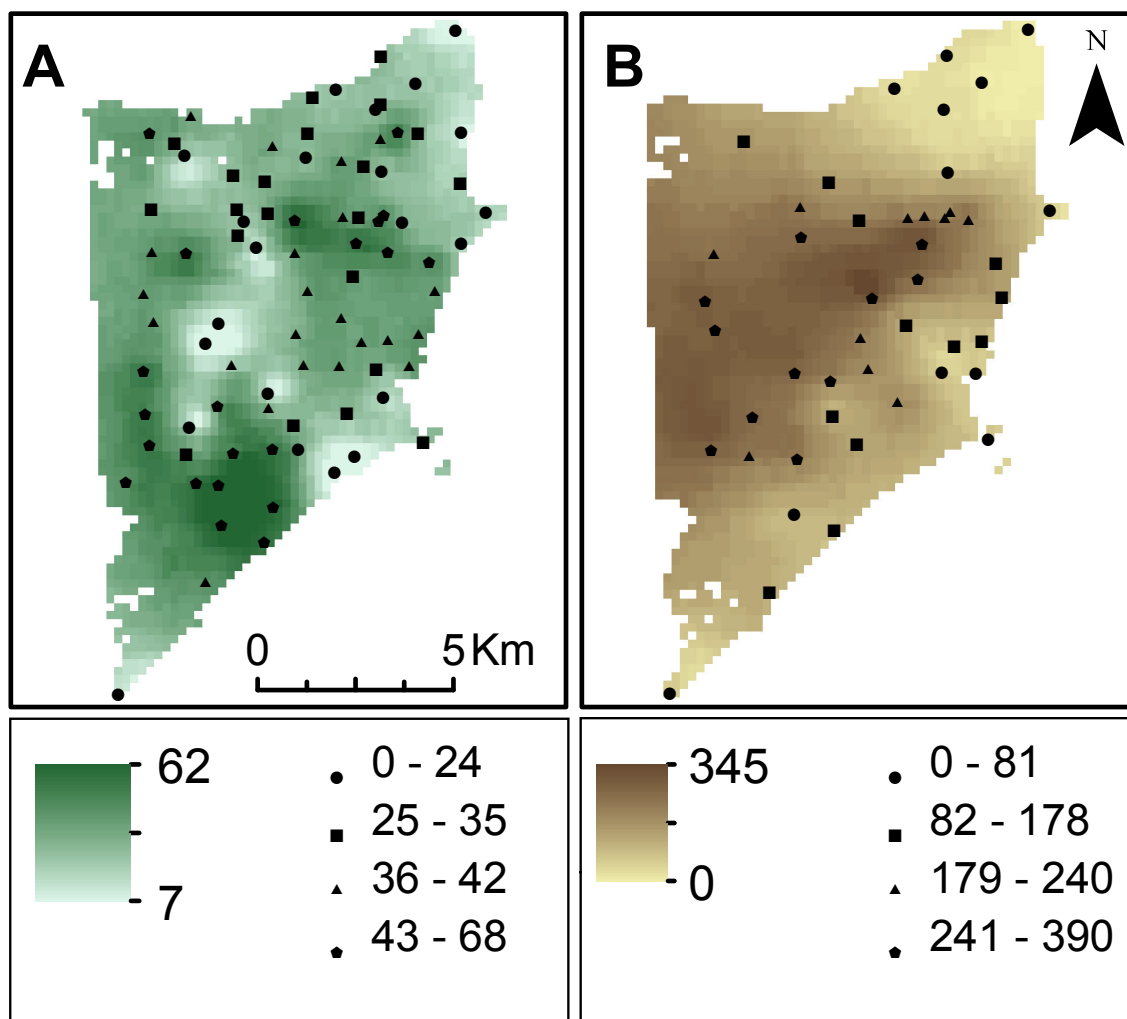

**Figure S6.** Vegetation and altitude at sampling sites of non-vector mosquito species (*C*) and *Anopheles cruzii* ( $X_m^*$ ): interpolations of ecologic niche axes. A: Vegetation biomass ( $\text{m}^3$  of wood per  $\text{m}^2$ ); B: Altitude (meters above the sea). Points represent field sampling locations that were utilized for performing interpolations (grid of 200 m-spatial resolution). Source: Bernardi et al. [1].

## References

1. Bernardi JVE, Landim PMB, Barreto CL, Monteiro RC (2005) Spatial study of the vegetation gradient from Cardoso Island State Park, SP, Brazil. *Holos Environ* 5: 1-21.
