# Supplementary material for: Biodiversity Can Help Prevent Malaria Outbreaks in Tropical Forests
Source: PubMed Central journal article supplement (PMC3605282; doi:10.1371/journal.pntd.0002139), 2013-03-21
Supplement: pntd.0002139.s010.pdf [file pntd.0002139.s010.pdf]

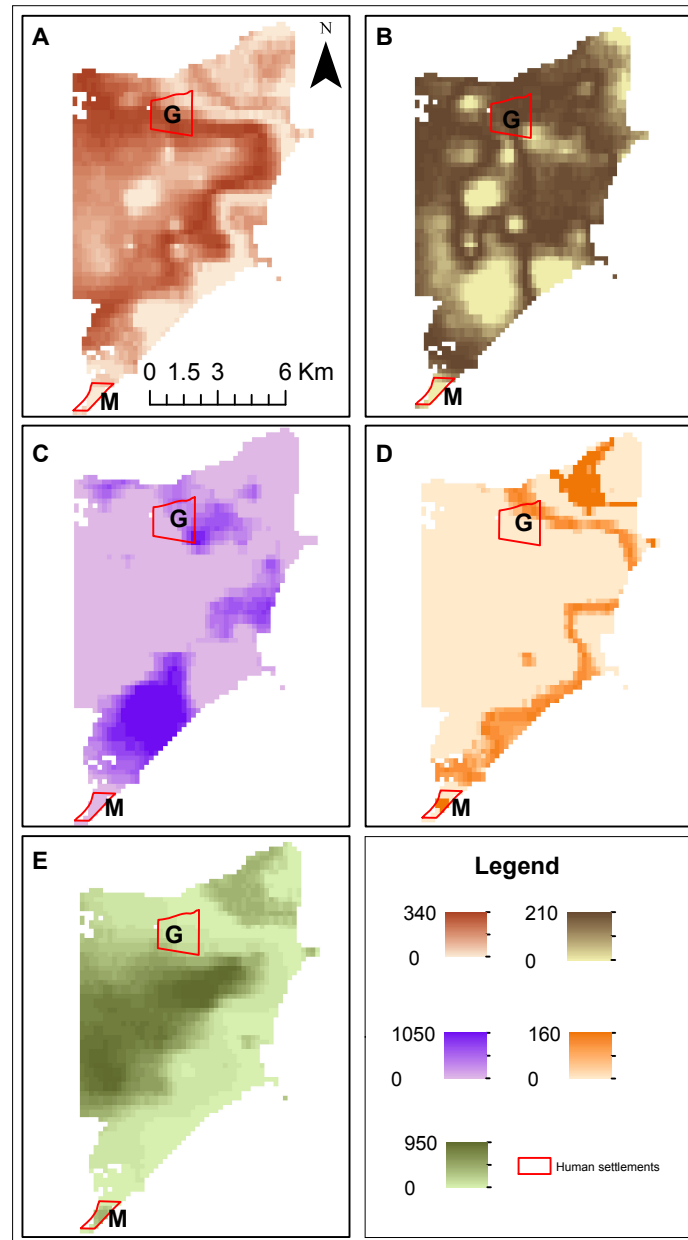

**Figure S7. Abundance of non-vector mosquito species (*C*) and *Anopheles cruzii* ( $X_m^*$ ): spatial abundance distribution modelling.** A: Abundance of *An. cruzii* (altitude  $\beta_1$  of 6.65 and vegetation biomass  $\beta_2$  of 2.13;  $R^2$ -adjusted = 0.91); B: Abundance of *Ae. serratus* (vegetation biomass  $\beta_1$  of 2.13;  $R^2$ -adjusted = 0.16); C: Abundance of *Li. durhami* (altitude  $\beta_1$  of 2.88 and vegetation biomass  $\beta_2$  of 1.00;  $R^2$ -adjusted = 0.93); D: Abundance of *Ru. reversa* (altitude  $\beta_1$  of 6.4;  $R^2$ -adjusted = 0.25); and E: Abundance of *Wy. quasilingirostris* (altitude  $\beta_1$  of 5.5;  $R^2$ -adjusted = 0.34; grid of 200 m-spatial resolution). G, The Guarani Mbya village; and M, Marujá.
