# Supplementary material for: Biodiversity Can Help Prevent Malaria Outbreaks in Tropical Forests
Source: PubMed Central journal article supplement (PMC3605282; doi:10.1371/journal.pntd.0002139), 2013-03-21
Supplement: pntd.0002139.s013.pdf [file pntd.0002139.s013.pdf]

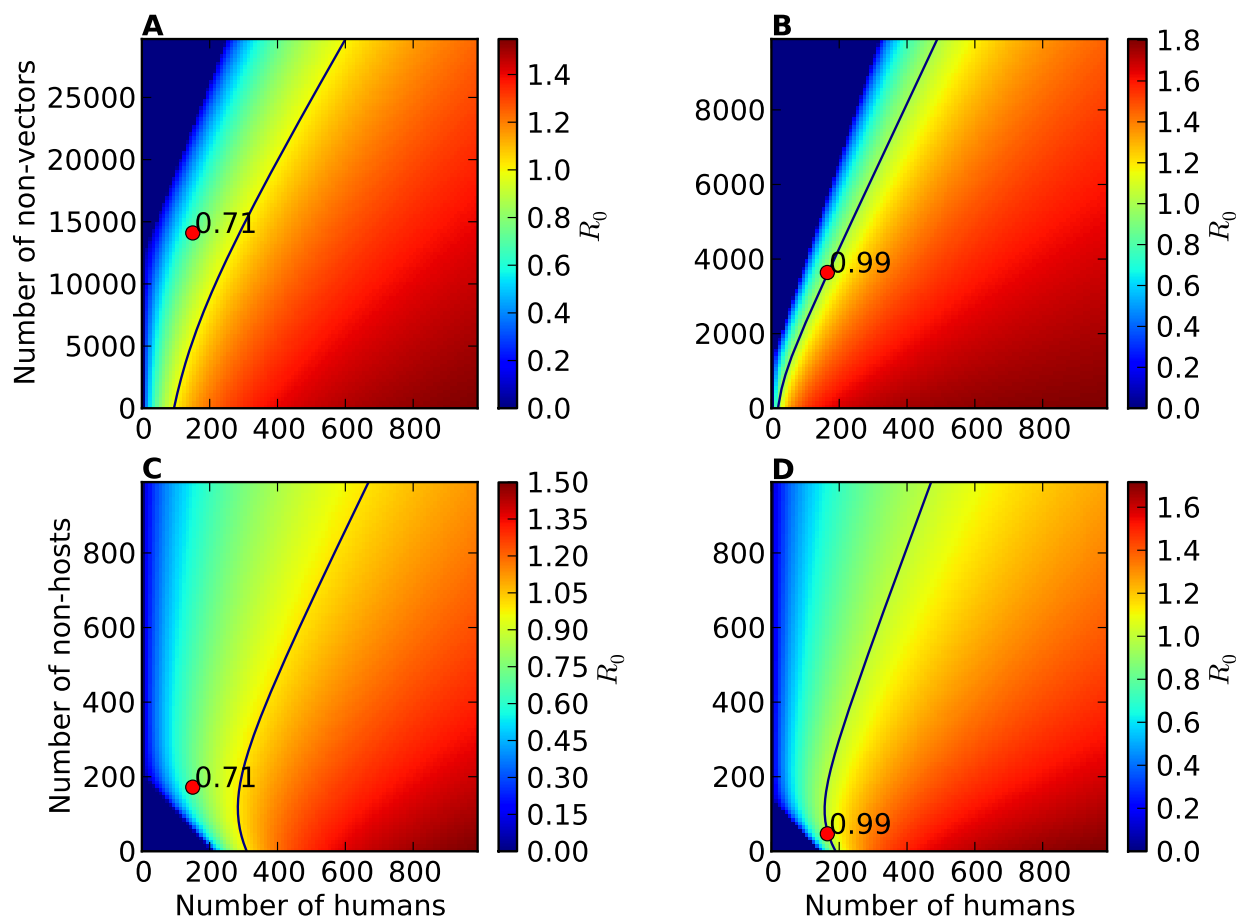

**Figure S10. Sensitivity analysis: if  $h = 29$  then  $R_0 < 1$ .** A, B: Decrease in abundance of non-vector mosquito species can increase risk of malaria transmission ( $R_0 > 1$ ) in The Guarani Mbya village and Marujá, respectively; C, D: Decrease in abundance of non-host vertebrate species does not increase risk of malaria transmission ( $R_0 < 1$ ) in The Guarani Mbya village and Marujá, respectively. D: Increase in abundance of non-host vertebrate species can increase risk of malaria transmission ( $R_0 > 1$ ) in Marujá, which is supported in the work by Saul [1]. The parameter  $\alpha$  is 4.3 in The Guarani Mbya village and 2.6 in Marujá.

## References

1. Saul A (2003) Zooprophylaxis or zoopotential: the outcome of introducing mortality while searching. *Malaria J* 2: 32.
