# Supplementary material for: Biodiversity Can Help Prevent Malaria Outbreaks in Tropical Forests
Source: PubMed Central journal article supplement (PMC3605282; doi:10.1371/journal.pntd.0002139), 2013-03-21
Supplement: pntd.0002139.s015.pdf [file pntd.0002139.s015.pdf]

**Table S1. Animal and bird species, density and population size estimates in the Parque Estadual da Ilha do Cardoso.**

| Species (popular name)                                         | Animal density<br>(n° of individuals per km <sup>2</sup> ) | Number of individuals<br>(n°) |
|----------------------------------------------------------------|------------------------------------------------------------|-------------------------------|
| <i>Odontophorus capueira</i> (spot-winged wood quail)          | 26.7 (18.0 - 37.2)                                         | 2,963 (2,004 - 4,129)         |
| <i>Ramphastos dicolorus</i> and <i>R. vitellinus</i> (toucans) | 12.2 (10.6 - 15.9)                                         | 1,354 (1,179 - 1,765)         |
| <i>Alouatta guariba</i> (howler monkey)                        | 8.9 (6.9 - 11.6)                                           | 997 (769 - 1,291)             |
| <i>Dasyprocta leporina</i> (agouti)                            | 3.4 (2.3 - 4.4)                                            | 385 (264 - 488)               |
| <i>Penelope obscura</i> and <i>P. supercilialis</i> (guans)    | 3.2 (2.8 - 4.2)                                            | 359 (311 - 467)               |
| <i>Pipile jacutinga</i> (guan)                                 | 2.1 (1.8 - 2.7)                                            | 234 (203 - 304)               |
| <i>Sciurus ingrami</i> (squirrel)                              | 1.6 (1.1 - 2.0)                                            | 182 (124 - 231)               |
| <i>Tinamus solitarius</i> (tinamou)                            | 1.2 (1.0 - 1.6)                                            | 140 (121 - 182)               |

Estimates of animal population size and density were performed in the software DISTANCE 4.1. The values in parentheses correspond to the lower and upper limits of 95% confidence interval. Source: Bernardo [1].

## References

1. Bernardo CSS (2004) Abundância, densidade e tamanho populacional de aves e mamíferos cinegéticos no Parque Estadual Ilha do Cardoso, SP, Brasil. Piracicaba: Universidade de São Paulo [Master's thesis]. 156 p.
