# Supplementary material for: Biodiversity Can Help Prevent Malaria Outbreaks in Tropical Forests
Source: PubMed Central journal article supplement (PMC3605282; doi:10.1371/journal.pntd.0002139), 2013-03-21
Supplement: pntd.0002139.s016.pdf [file pntd.0002139.s016.pdf]

Table S2. Mosquito species and vegetation types in the Parque Estadual da Ilha do Cardoso.

| Species                             | Scrub vegetation | Restinga | Tropical pluvial forest |
|-------------------------------------|------------------|----------|-------------------------|
| <i>Aedes albifasciatus</i>          | 13               | 0        | 0                       |
| <i>Aedes hastatus</i>               | 3                | 18       | 2                       |
| <i>Aedes fulvus</i>                 | 0                | 2        | 0                       |
| <i>Aedes oligopistus</i>            | 4                | 26       | 2                       |
| <i>Aedes scapularis</i>             | 542              | 79       | 6                       |
| <i>Aedes serratus</i>               | 26               | 160      | 21                      |
| <i>Anopheles bellator</i>           | 26               | 9        | 0                       |
| <i>Anopheles cruzii</i>             | 23               | 33       | 90                      |
| <i>Anopheles homunculus</i>         | 1                | 11       | 15                      |
| <i>Anopheles maculipes</i>          | 1                | 0        | 0                       |
| <i>Anopheles mediopunctatus</i>     | 1                | 0        | 1                       |
| <i>Coquillettidia chrysonotum</i>   | 766              | 337      | 93                      |
| <i>Coquillettidia venezuelensis</i> | 3                | 3        | 1                       |
| <i>Culex imitator</i>               | 1                | 0        | 0                       |
| <i>Culex inadimirabilis</i>         | 77               | 0        | 0                       |
| <i>Culex neglectus</i>              | 0                | 2        | 0                       |
| <i>Culex ocosa</i>                  | 2                | 0        | 0                       |
| <i>Culex ribeirensis</i>            | 83               | 0        | 0                       |
| <i>Culex sacchettae</i>             | 9                | 15       | 0                       |
| <i>Psorophora albigena</i>          | 0                | 9        | 0                       |
| <i>Psorophora albipes</i>           | 0                | 8        | 0                       |
| <i>Psorophora ferox</i>             | 7                | 64       | 0                       |
| <i>Limatus durhami</i>              | 0                | 42       | 14                      |
| <i>Limatus flavisetosus</i>         | 0                | 16       | 3                       |
| <i>Runchomyia cerqueirai</i>        | 0                | 5        | 0                       |
| <i>Runchomyia frontosa</i>          | 0                | 0        | 3                       |
| <i>Runchomyia humboldti</i>         | 0                | 4        | 1                       |
| <i>Runchomyia reversa</i>           | 0                | 54       | 1                       |
| <i>Runchomyia theobaldi</i>         | 0                | 29       | 2                       |
| <i>Sabethes intermedius</i>         | 0                | 1        | 0                       |
| <i>Sabethes soperi</i>              | 0                | 1        | 0                       |
| <i>Trichoprosopon pallidiventer</i> | 0                | 2        | 2                       |
| <i>Wyeomyia aporonoma</i>           | 0                | 4        | 3                       |
| <i>Wyeomyia confusa</i>             | 0                | 11       | 4                       |
| <i>Wyeomyia mulhensi</i>            | 10               | 137      | 8                       |
| <i>Wyeomyia occulta</i>             | 0                | 1        | 0                       |
| <i>Wyeomyia pallidiventer</i>       | 0                | 61       | 0                       |
| <i>Wyeomyia pertinens</i>           | 0                | 5        | 1                       |
| <i>Wyeomyia quasilongirostris</i>   | 12               | 228      | 18                      |
| <i>Wyeomyia shannoni</i>            | 0                | 1        | 0                       |
| <i>Wyeomyia theobaldi</i>           | 0                | 17       | 3                       |
