# Supplementary material for: Biodiversity Can Help Prevent Malaria Outbreaks in Tropical Forests
Source: PubMed Central journal article supplement (PMC3605282; doi:10.1371/journal.pntd.0002139), 2013-03-21
Supplement: pntd.0002139.s017.pdf [file pntd.0002139.s017.pdf]

**Table S3. Mosquito abundance regression models, independent variables and Akaike Information Criteria values.**

| Model   | Independent variables | <i>Anopheles cruzii</i> | <i>Aedes serratus</i> | <i>Runchomyia reversa</i> | <i>Limatus durhami</i> | <i>Wyeomyia quasilingirostris</i> |
|---------|-----------------------|-------------------------|-----------------------|---------------------------|------------------------|-----------------------------------|
| 1. GL   | Alt                   | 190.89                  | 212.76                | 165.98                    | 161.03                 | 241.25                            |
| 2. GL   | Bioveg                | 210.70                  | 209.61                | 165.72                    | 162.10                 | 239.60                            |
| 3. GL   | Alt + Bioveg          | 190.83                  | 209.12                | 162.94                    | 162.19                 | 234.18                            |
| 4. GL   | Alt × Bioveg          | 192.15                  | 209.10                | 164.52                    | 156.58                 | 236.10                            |
| 5. a-LS | Alt                   | 194.81                  | 211.67                | 173.20                    | 151.96                 | 232.35                            |
| 6. a-LS | Bioveg                | 201.69                  | 209.52                | 169.21                    | 146.64                 | 228.22                            |
| 7. a-LS | Alt + Bioveg          | 195.63                  | 210.22                | 175.46                    | 154.15                 | 229.01                            |
| 8. a-LS | Alt × Bioveg          | 205.92                  | 219.95                | 186.86                    | 165.53                 | 238.09                            |
| 9. NB   | Alt                   | 140.35                  | 183.89                | 111.82                    | 91.83                  | 195.57                            |
| 10. NB  | Bioveg                | 149.95                  | 178.85                | 110.87                    | 83.25                  | 189.81                            |
| 11. NB  | Alt + Bioveg          | 142.10                  | 177.81                | 100.49                    | 83.87                  | 181.62                            |
| 12. NB  | Alt × Bioveg          | 143.95                  | 177.81                | 86.40                     | 72.64                  | 183.59                            |
| 13. GA  | Alt                   | 139.81                  | 177.94                | 83.81 <sup>a</sup>        | 62.92                  | 160.22 <sup>a</sup>               |
| 14. GA  | Bioveg                | 149.86                  | 175.37 <sup>a</sup>   | 86.55                     | 58.41                  | 174.62                            |
| 15. GA  | Alt + Bioveg          | 136.45 <sup>a</sup>     | 178.23                | 84.34                     | 57.34 <sup>a</sup>     | 164.58                            |
| 16. GA  | Alt × Bioveg          | NC                      | 177.74                | NC                        | NC                     | NC                                |

Model: GL, Gaussian linear regression model (the simplest model); a-LS, autoregressive least square model (it considered spatial correlation structure); NB, negative binomial regression model (it considered exponential non-linear relationship between mosquito abundance and independent variables); and GA, generalized additive regression model (it considered exponential non-linear relationship and a very flexible smooth function that maximize model fit).

Independent variables: Alt, altitude interpolation; Bioveg, vegetation biomass interpolation; Alt + Bioveg, sum of effects; Alt × Bioveg, interaction.

NC: model did not converge to a result.

<sup>a</sup>: The best model, i.e., the lowest Akaike Information Criteria value.
